# Supplementary material for: Study on the community structure and function of symbiotic bacteria from different growth and developmental stages of Hypsizygus marmoreus
Source: Research Square preprint supplement (doi:10.21203/rs.3.rs-25211/v5), 2020-10-13
Supplement: Supplementary file 1 [file 3a904174140511d7588c727c.pdf]

## **Supplementary Materials**

**Study on the community structure and function of symbiotic bacteria at different growth and developmental stages of *Hypsizygus marmoreus***

**Shujing Sun<sup>#\*</sup>, Fan Li<sup>#</sup>, Xin Xu, Yunchao Liu, Xuqiang Kong, Jianqiu Chen, Ting Liu, and Liding Chen**

*College of Life Sciences, Fujian Agriculture and Forestry University, Fuzhou 350002, People's Republic of China*

*<sup>#</sup>These authors contributed equally to this work and joint first authors.*

\* To whom correspondence should be addressed: College of Life Sciences, Fujian Agriculture and Forestry University, Fuzhou 350002, P. R. China. Tel.: +86-591-83789492; Fax: +86-591-83789352. E-mail address: shjsun2004@126.com

**Short title:** Mushroom symbiotic bacteria and their function

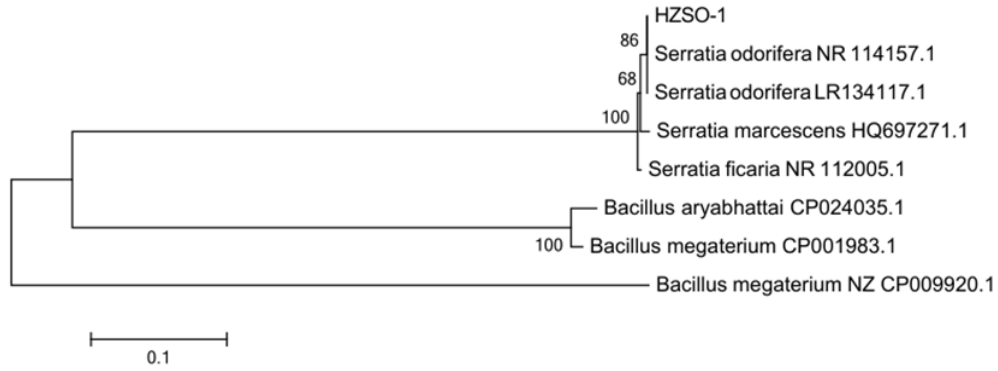

**Fig. S1** Phylogenetic tree of HZSO-1 strain based on 16S rDNA sequences

Note: The value on the branch point is the support rate. The ruler 0.1 is the evolution distance

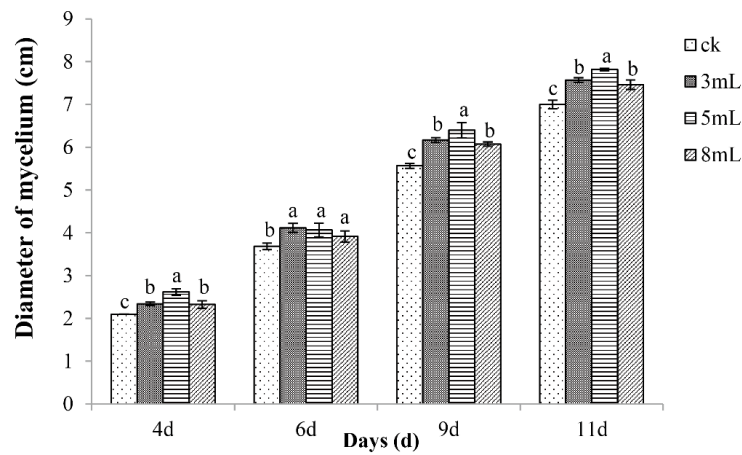

**Fig. S2** Dosage effects of 0.22-µm filter-sterilized fermentation broth of *S. odorifera* HZSO-1 on the growth rate of *H. marmoreus* hyphae. Note: Different lowercase letters indicate a significant difference between treatments at the  $P < 0.05$  level.

**Table S1 A description of the content of each sample as shown in Figure 7**

| A          | B           | C           | D           | E           |
|------------|-------------|-------------|-------------|-------------|
| Hyphae     | ---         | Mycelia     | Mycelia     | Mycelia     |
| PDA        | Cultivation | Cultivation | Cultivation | Cultivation |
| enrichment | substrate   | substrate   | substrate   | substrate   |
| medium     |             |             |             |             |

**Table S2 OTUs from the different samples and replicates**

| Samples    | HMCK | HMBH | HMBF | HMBm | HMPM |
|------------|------|------|------|------|------|
| Replicates |      |      |      |      |      |
| 1          | 64   | 39   | 38   | 45   | 458  |
| 2          | 181  | 34   | 61   | 209  | 527  |
| 3          | 32   | 21   | 52   | 86   | 501  |
